# Supplementary material for: VDAC regulates AAC-mediated apoptosis and cytochrome c release in yeast
Source: PubMed Central journal article supplement (PMC5348984; doi:10.15698/mic2016.10.533), 2016-08-25
Supplement: mic-03-500-s01.pdf [file mic-03-500-s01.pdf]

## Supplemental Material – Figure S1

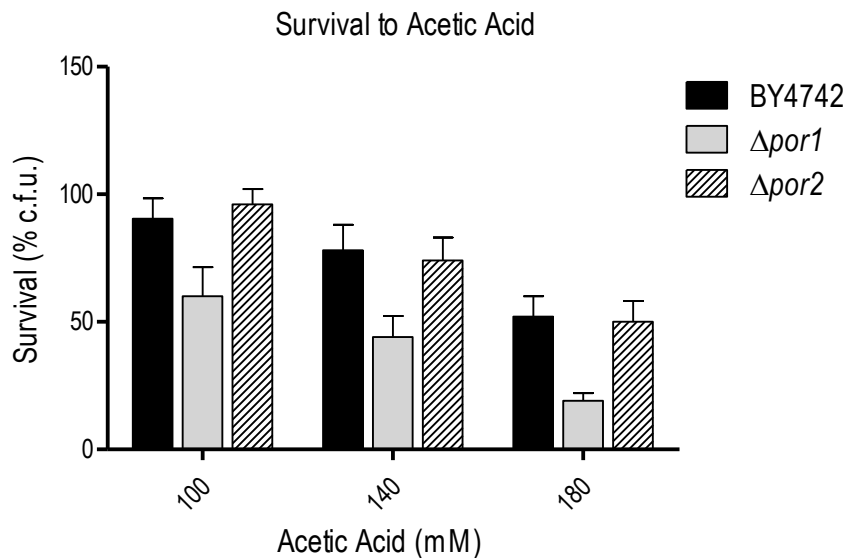

**Fig. S1** –  $\Delta por1$ , but not  $\Delta por2$ , mutant exhibits increased cell death in response to different concentrations of acetic acid. Bars represent cell survival of a wild-type strain (BY4742),  $\Delta por1$  and  $\Delta por2$  after 200 min treatment with 100, 140 and 180 mM acetic acid. Total c.f.u. number at T0 was considered as 100 % survival. Cells lacking Por1p exhibit increased sensitivity to the different acetic acid treatments, when compared to the wild-type strain. On the other hand, absence of Por2p does not affect the resistance of yeast cells to acetic acid, with the survival of  $\Delta por2$  cells being significantly different (higher) from that of  $\Delta por1$  cells, and identical to that of the parental strain. Values are means  $\pm$  SD of four independent experiments. Statistical analysis was performed using a Two-way ANOVA and Bonferroni post-tests (P-values: (\*\*\*)  $P < 0.001$ ).

## Supplemental Material – Figure S2

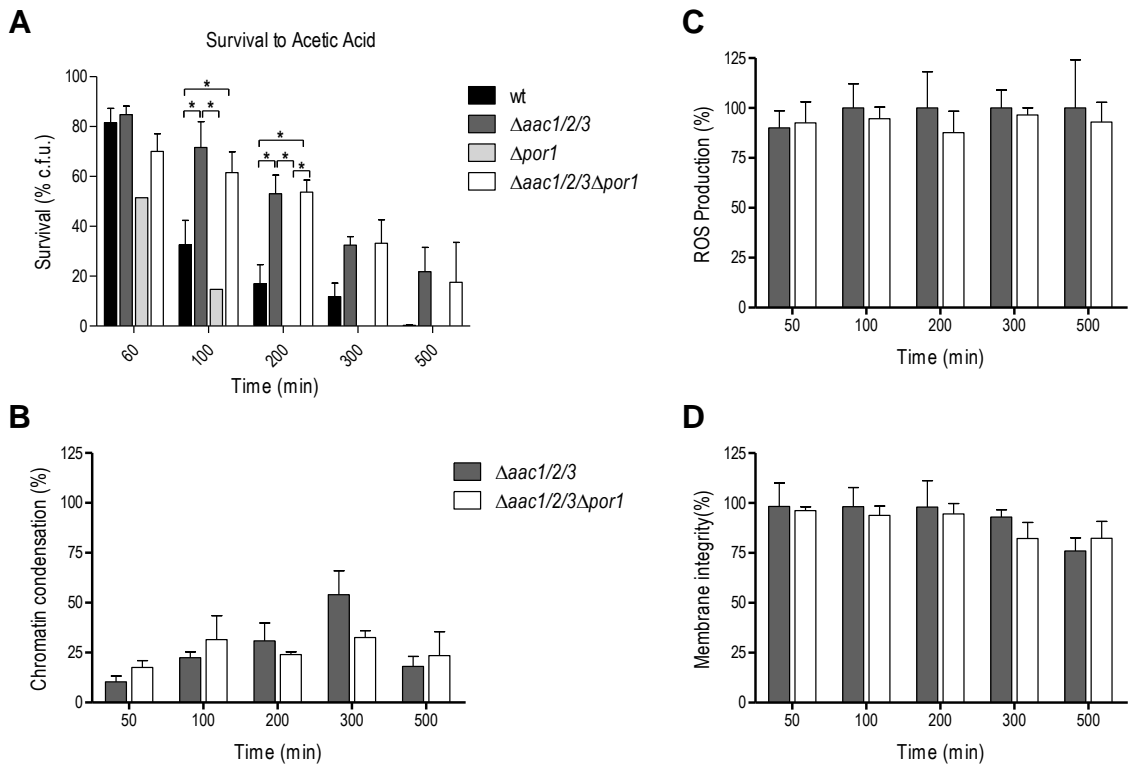

**Fig. S2** – Survival of wt,  $\Delta aac1/2/3$ ,  $\Delta por1$  and  $\Delta aac1/2/3\Delta por1$  cells (A), and the kinetic analyses of ROS production (B), chromatin condensation (C) and membrane integrity (D) of  $\Delta aac1/2/3\Delta por1$  cells was carried out over 500 min acetic acid treatment. Absence of AAC proteins reverts the sensitivity phenotype resulting from *POR1* deletion (P-values: (\*)  $P < 0.05$ ). Mitochondrial ROS production, evidenced by MitoTracker Red CM-H2XRos staining, showed a high level of positive cells from the beginning of the treatment, while chromatin condensation using DAPI staining, exhibited a maximum percentage of 40% at 100 min. Finally, loss of membrane integrity using PI staining showed a low level of positive cells indicating that death was not accompanied by loss of membrane integrity. The results showed that as for  $\Delta aac1/2/3$  strain, the higher resistance of  $\Delta por1\Delta aac1/2/3$  strain is associated with a delayed emergence of apoptotic markers.
